# Supplementary material
Source: Research Square preprint supplement (doi:10.21203/rs.3.rs-9691621/v1)
Supplement: Supplementary file 1 [file 0ca80f4a0eed4ea315e7e776.docx]

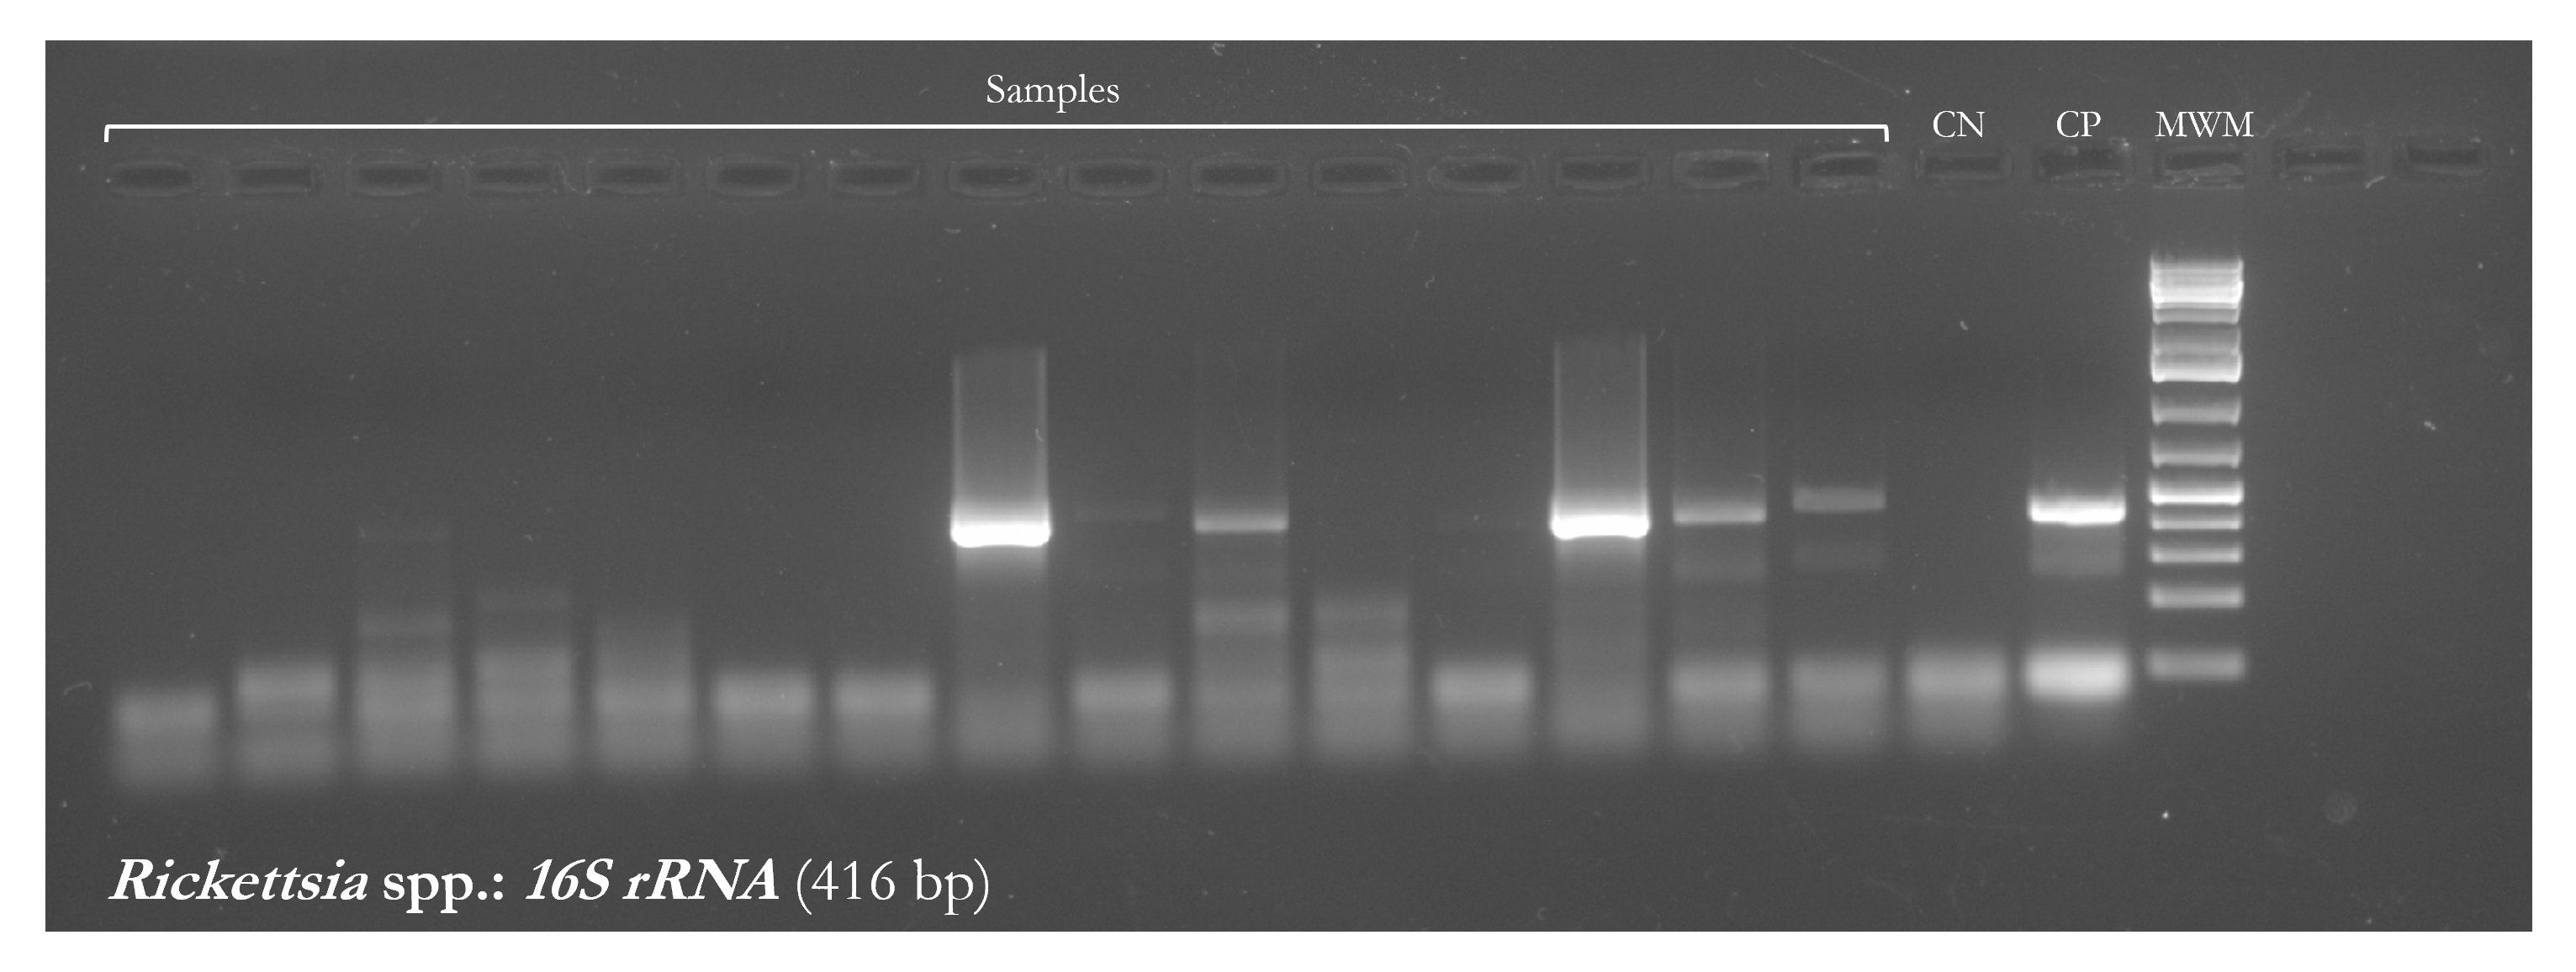
**Figure S1.** Agarose gel electrophoresis of PCR products of the *16S rRNA* gene fragment of *Rickettsia* spp. MWM: molecular weight marker; CP: positive control; CN: negative control.


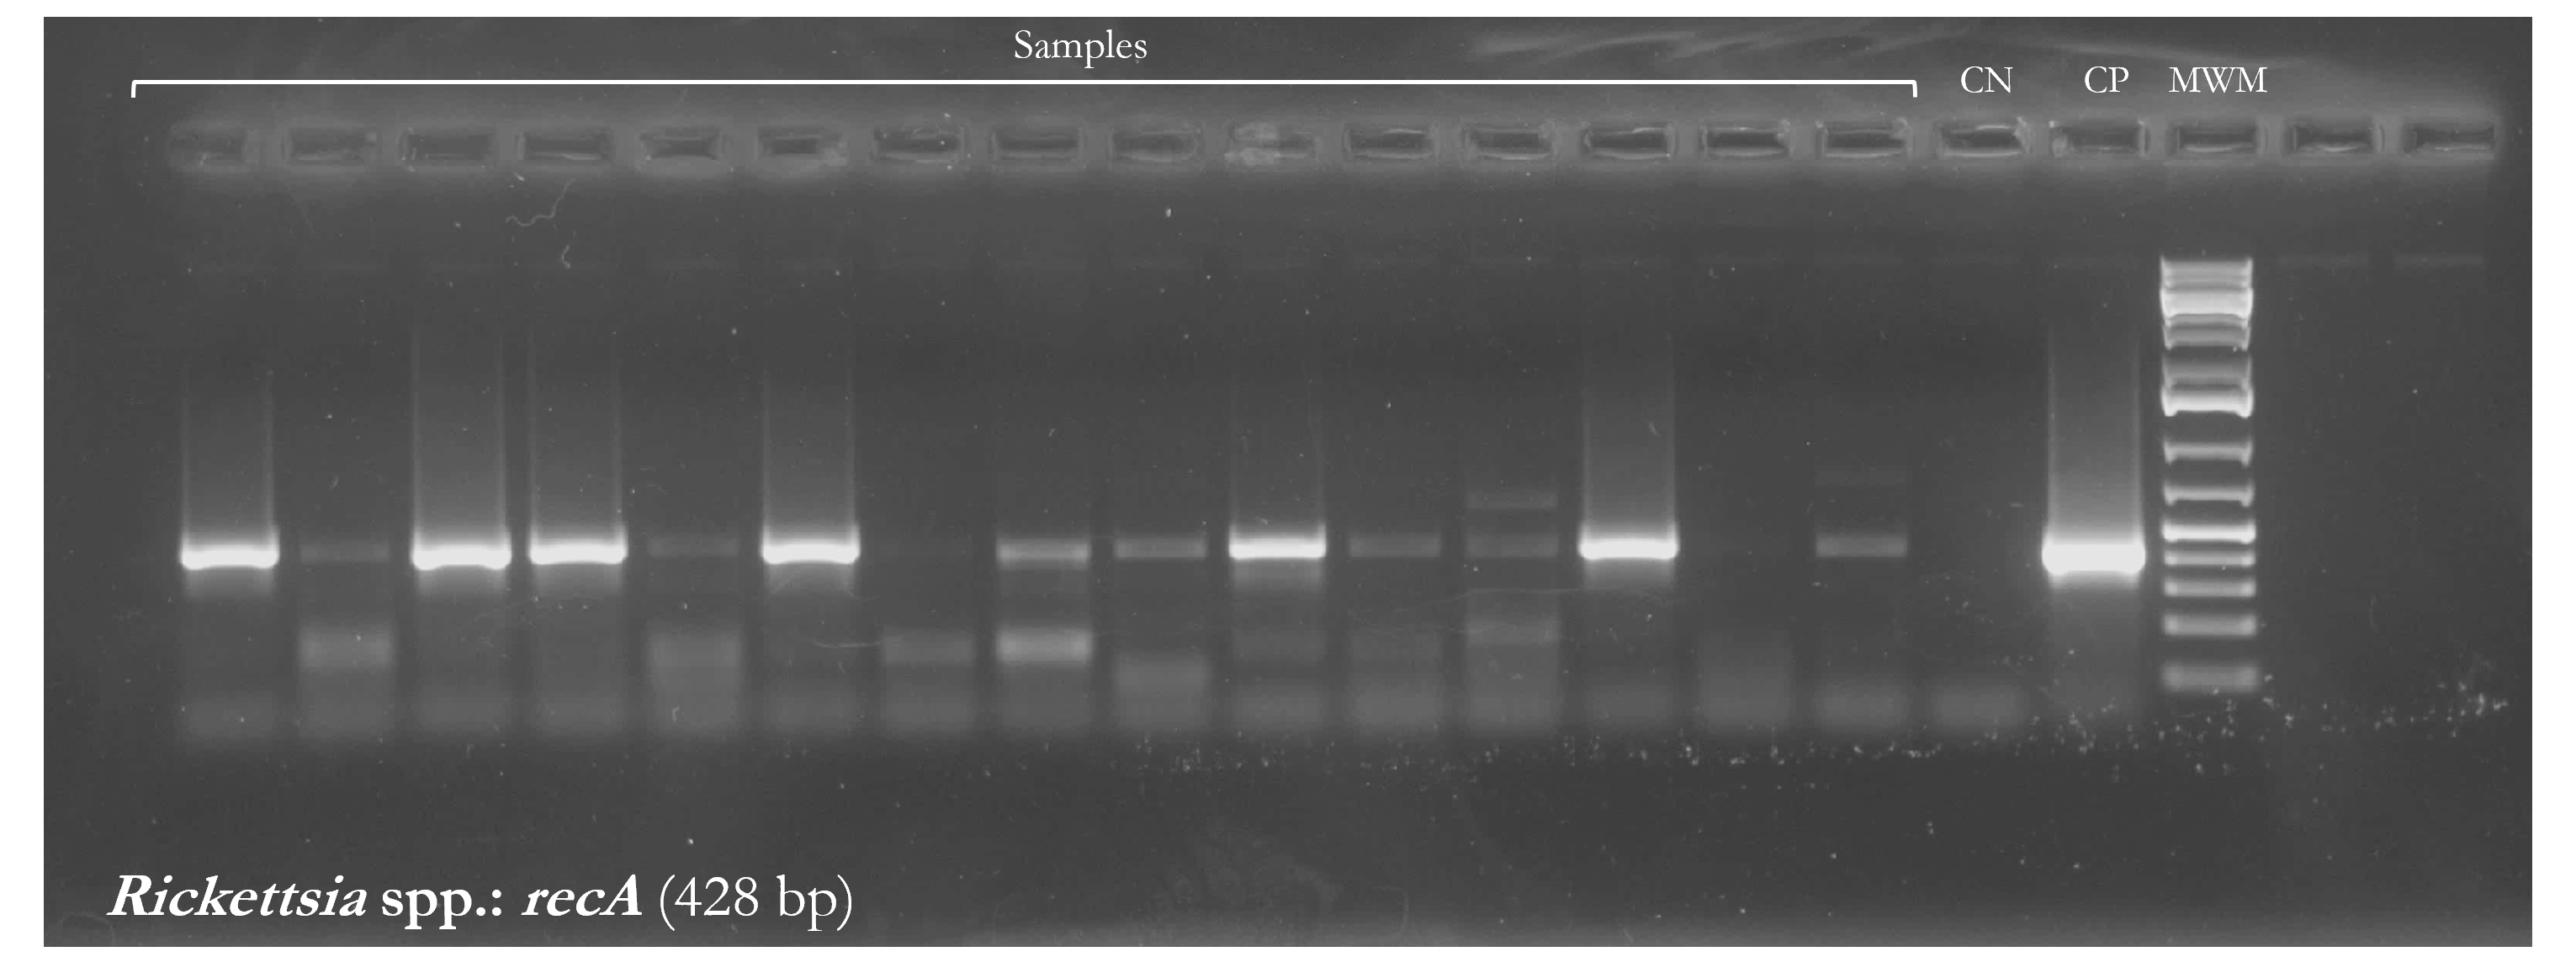
**Figure S2.** Agarose gel electrophoresis of PCR products of the *recA* gene fragment of *Rickettsia* spp. MWM: molecular weight marker; CP: positive control; CN: negative control.


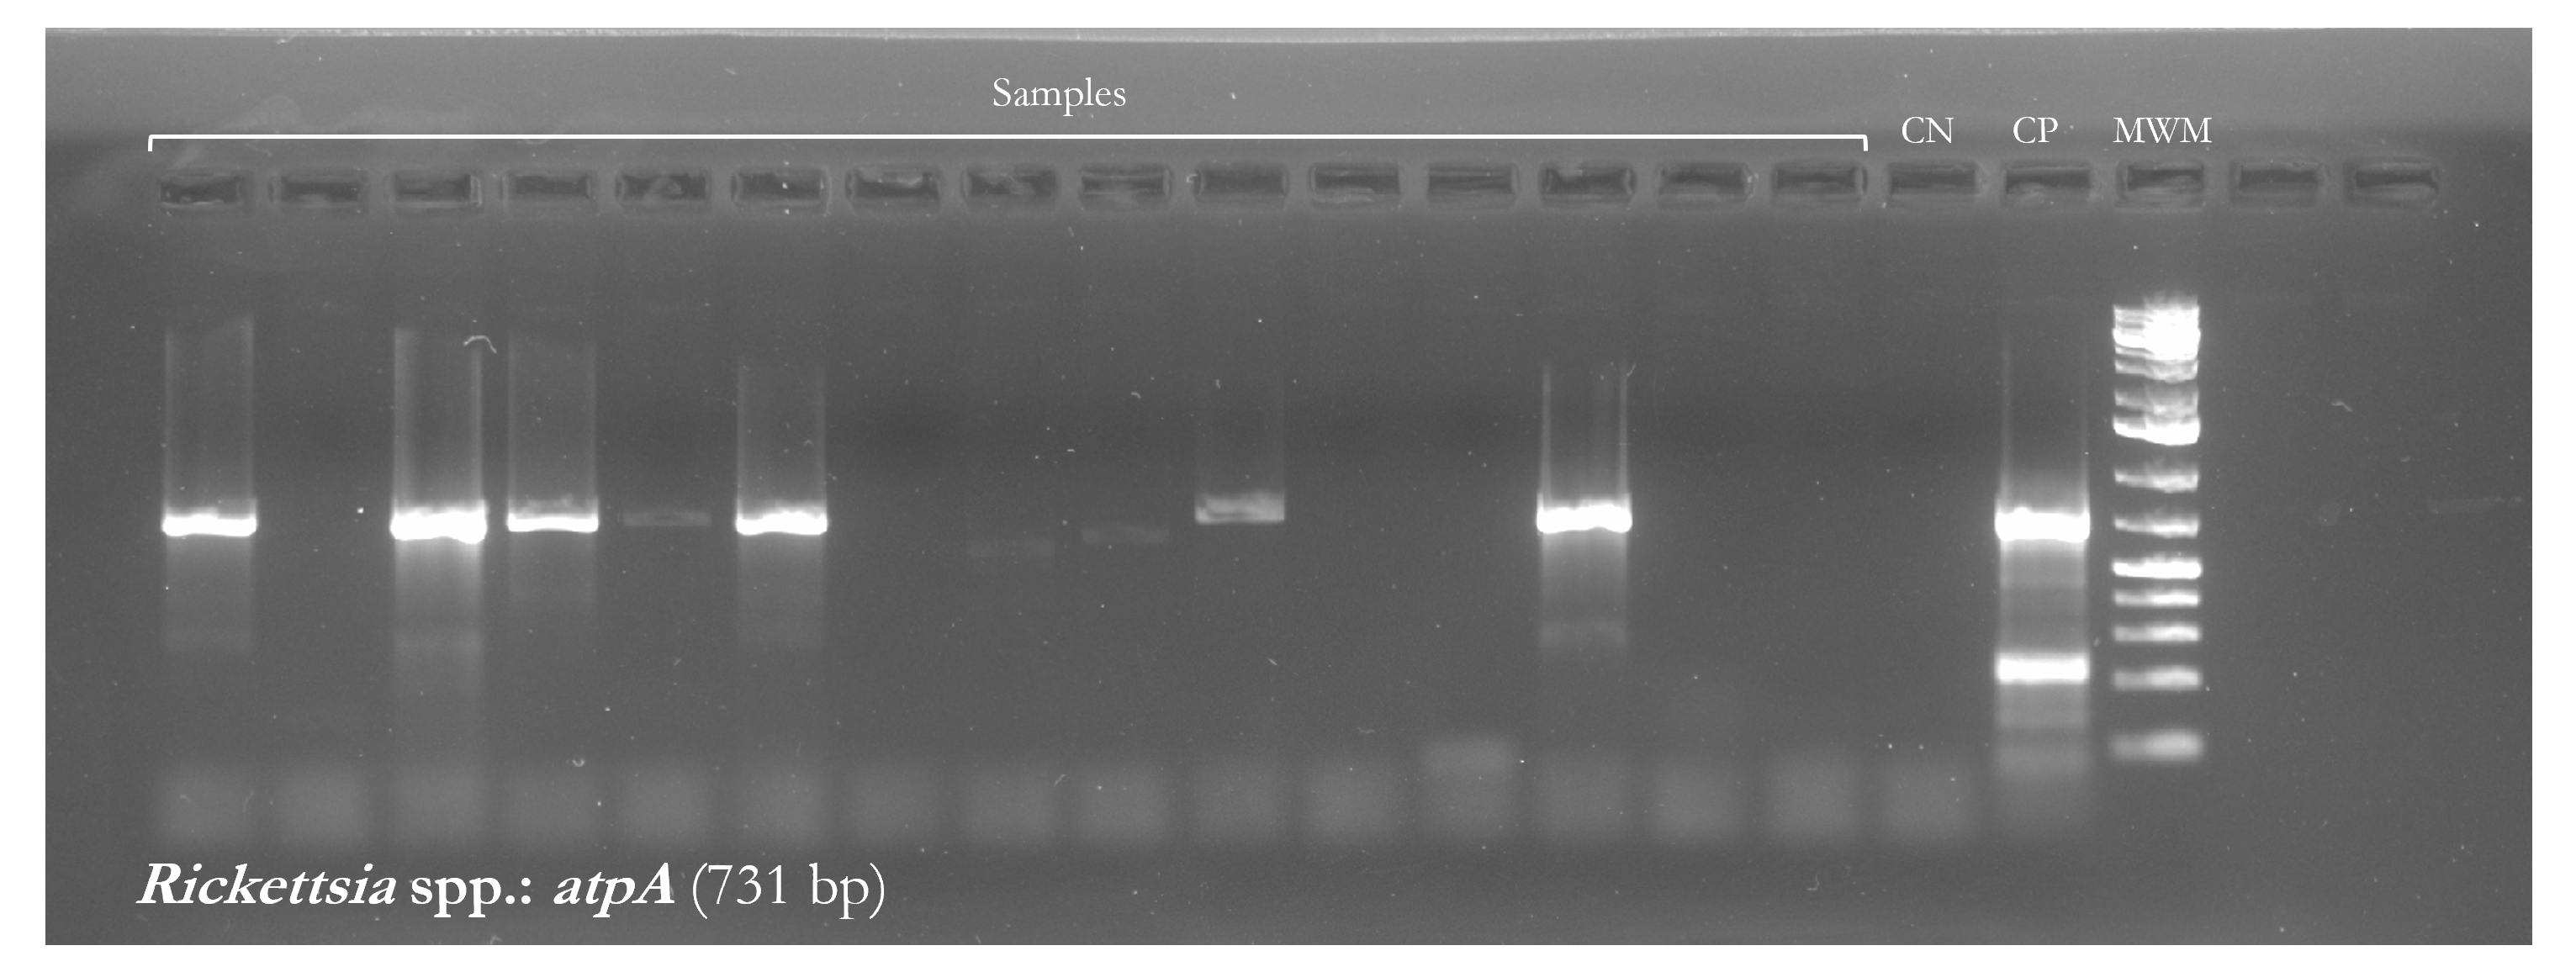
**Figure S3.** Agarose gel electrophoresis of PCR products of the *atpA* gene fragment of *Rickettsia* spp. MWM: molecular weight marker; CP: positive control; CN: negative control.


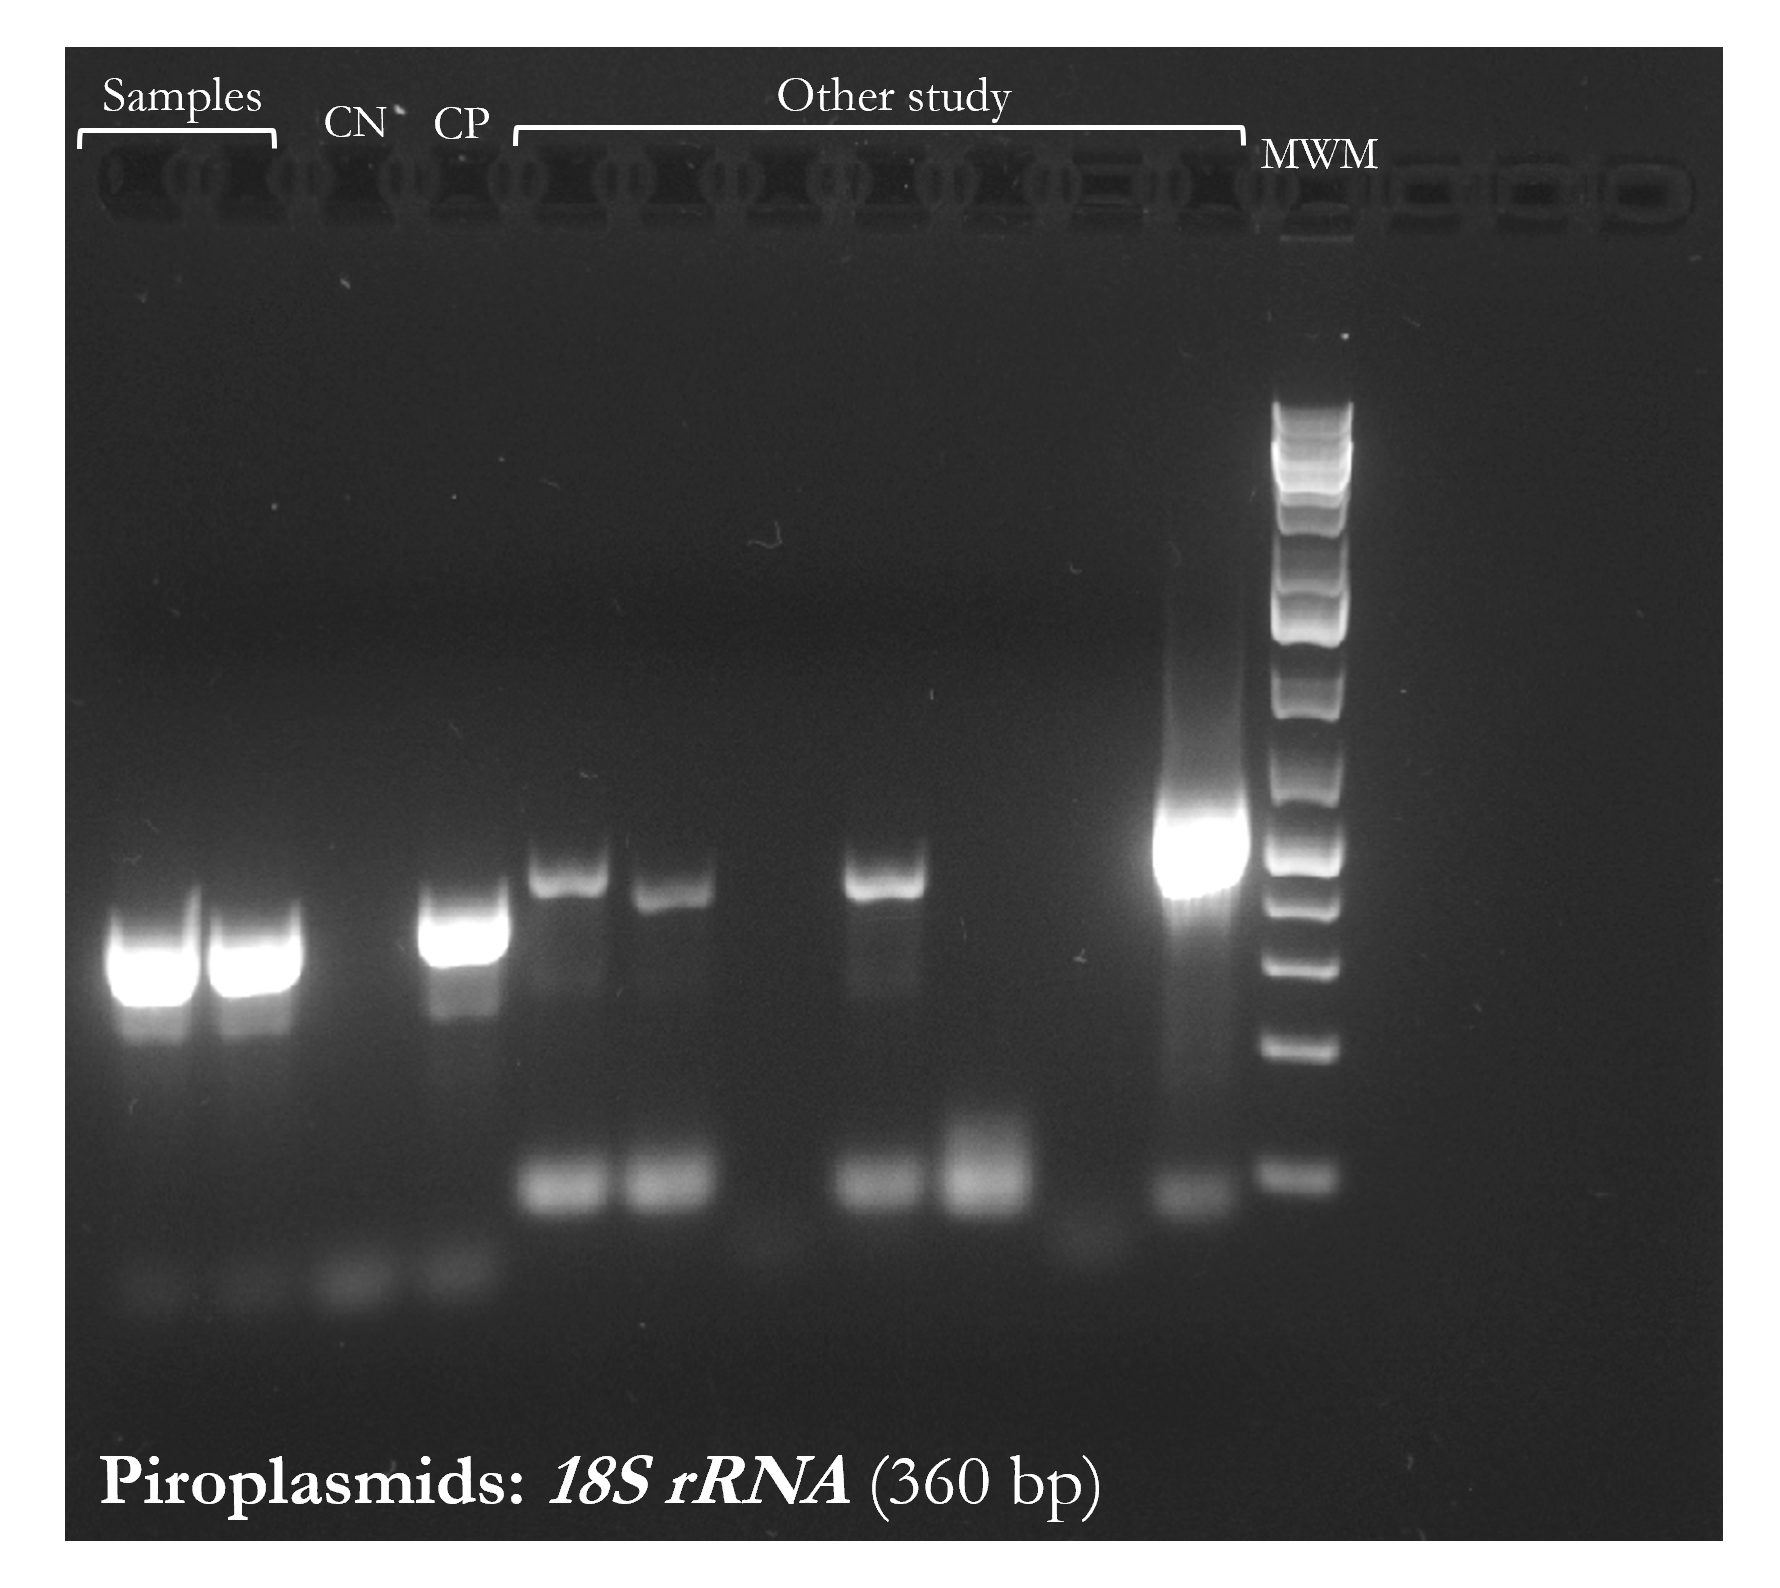
**Figure S4.** Agarose gel electrophoresis of PCR products of the *18S rRNA* gene fragment of piroplasmids. MWM: molecular weight marker; CP: positive control; CN: negative control.
