# Supplementary material
Source: Research Square preprint supplement (doi:10.21203/rs.3.rs-9691621/v1)
Supplement: Supplementary file 2 [file cad5076d295497a37c075b1a.docx]

**Table 1.** Number of common lizards (*Zootoca vivipara louislantzi*) captured by site, season, age and sex groups in the Central Pyrenees, Spain. Two individuals could not be assigned to sex and are included in the total counts.

| **Site** | **Season** | **Age class** | **Female** | **Male** |
| --- | --- | --- | --- | --- |
| **Site 1 (Somport)** | Spring | Adult | 13 | 8 |  |
|  |  | Juvenile | 7 | 3 |
|  | Summer | Adult | 31 | 13 |
|  |  | Juvenile | 19 | 16 |
| **Site 2 (Candanchú)** | Summer | Adult | 15 | 0 |
|  |  | Juvenile | 10 | 0 |

**Table 2.** Primers and conditions used for the amplification and characterization of *Rickettsia* spp. and *Babesia* spp. in *Ixodes ricinus* feeding on common lizards (*Zootoca vivipara* *louislantzi*) in the Central Pyrenees, Spain.

| ***G*ene target1** | **Primers** | | **Size (bp)** | **Annealing conditions** | **Reference** |
| --- | --- | --- | --- | --- | --- |
| **Name** | **Sequence (5’ – 3’)** |
| ***Rickettsia* spp.** |  |  |  |  |  |
| 16S ribosomal RNA (*16S rRNA*) | fD1 | AGAGTTTGATCCTGGCTCAG | 416 | 30 s at 54ºC | Weisburg et al. (1989) |
| Rc16 | AACGTCATTATCTTCCTTGC |
| Recombinase A gene(*recA*) | F | TGCTTTTATTGATGCCGAGC | 428 | 30 s at 52ºC | Fernández de Mera et al. (2009) |
| R | CTTTAATGGAGCCGATTCTTC |
| Adenosine triphosphate synthase alpha subunit gene (*atpA*) | F | ACATATCGAGATGAAGGCTCC | 731 | 30 s at 48°C | Fernández de Mera et al. (2009) |
| R | CCGAAATACCGACATTAACG |
| ***Babesia* spp.** |  |  |  |  |  |
| 18S ribosomal RNA (18S rRNA) | PIRO F | CCAGCAGCCGCGGTAATTC | 360 | 45 s at 64ºC | (Tabar et al. 2008) |
| PIRO R | CTTTCGCAGTAGTTYGTCTTTAACAAATCT |

**Table 3.** Description of the infestation by *Ixodes ricinus* in 137 common lizards (*Zootoca vivipara* *louislantzi*)captured in the central Pyrenees.

| **Tick stage** | **Larvae** | **Nymphs** | **Overall** |
| --- | --- | --- | --- |
| % Prevalence (95% CI) | 91.9 (86.1–95.9) | 45.9 (37.4–54.7) | 98.5 (94.8–99.8) |
| Range | *0-37* | *0-12* | *0-41* |
| Mean abundance ± SD | 4.8 ± 6.1 | 1.0 ± 1.7 | 5.8 ± 7.0 |
| Mean intensity ± SD | 5.3 ± 6.2 | 2.2 ± 1.9 | 5.9 ± 7.0 |
|  |  |  |  |

**Table 4.** Results of the negative binomial generalized linear models (GLMs) assessing the effects of sex, age, and site–season on total, larval and nymphal tick infestation. Model estimates (β) with their standard errors (SE) are presented on the log scale. Incidence Rate Ratios (IRRs) are the exponentiated estimates with 95% confidence intervals (CI).

| **Model** | **Predictor** | **β** | **SE** | **z value** | **p-value** | **IRR** | **95% CI** |
| --- | --- | --- | --- | --- | --- | --- | --- |
| **Total tick abundance** | (Intercept) | 2.169 | 0.171 | 12.7 | <0.001 | 8.75 | 6.03–12.81 |
|  | Sex (Male vs Female) | 0.354 | 0.148 | 2.39 | 0.017 | 1.43 | 1.07–1.91 |
|  | Age (Adult vs Juvenile) | 0.268 | 0.138 | 1.95 | 0.052 | 1.31 | 0.98–1.74 |
|  | Site-season (Site 1 Summer vs Site 1 Spring) | -1.035 | 0.153 | -6.76 | <0.001 | 0.36 | 0.26–0.49 |
|  | Site-season (Site 2 Summer vs Site 1 Spring) | -1.165 | 0.215 | -5.42 | <0.001 | 0.31 | 0.20–0.48 |
| **Larval abundance** | (Intercept) | 1.99 | 0.198 | 10.05 | <0.001 | 7.31 | 4.74–11.43 |
|  | Sex (Male vs Female) | 0.373 | 0.171 | 2.18 | 0.029 | 1.45 | 1.04–2.04 |
|  | Age (Adult vs Juvenile) | 0.193 | 0.158 | 1.22 | 0.222 | 1.21 | 0.87–1.68 |
|  | Site-season (Site 1 Summer vs Site 1 Spring) | -0.983 | 0.178 | -5.51 | <0.001 | 0.37 | 0.26–0.54 |
|  | Site-season (Site 2 Summer vs Site 1 Spring) | -1.062 | 0.247 | -4.31 | <0.001 | 0.35 | 0.21–0.57 |
| **Nymphal abundance** | (Intercept) | 0.186 | 0.267 | 0.7 | 0.486 | 1.2 | 0.69–2.05 |
|  | Sex (Male vs Female) | 0.312 | 0.221 | 1.41 | 0.159 | 1.37 | 0.89–2.10 |
|  | Age (Adult vs Juvenile) | 0.829 | 0.243 | 3.41 | <0.001 | 2.29 | 1.43–3.79 |
|  | Site-season (Site 1 Summer vs Site 1 Spring) | -1.309 | 0.218 | -6.01 | <0.001 | 0.27 | 0.18–0.41 |
|  | Site-season (Site 2 Summer vs Site 1 Spring) | -1.774 | 0.393 | -4.52 | <0.001 | 0.17 | 0.07–0.35 |

Note: Reference categories used in the models were: female (sex), juvenile (age), spring (season), Site 1–Spring (site–season).
